# Supplementary material
Source: PubMed Central journal article supplement (PMC6237474)
Supplement: jciinsight-3-122467-s226.pdf [file jciinsight-3-122467-s226.pdf]

## Supplementary Materials

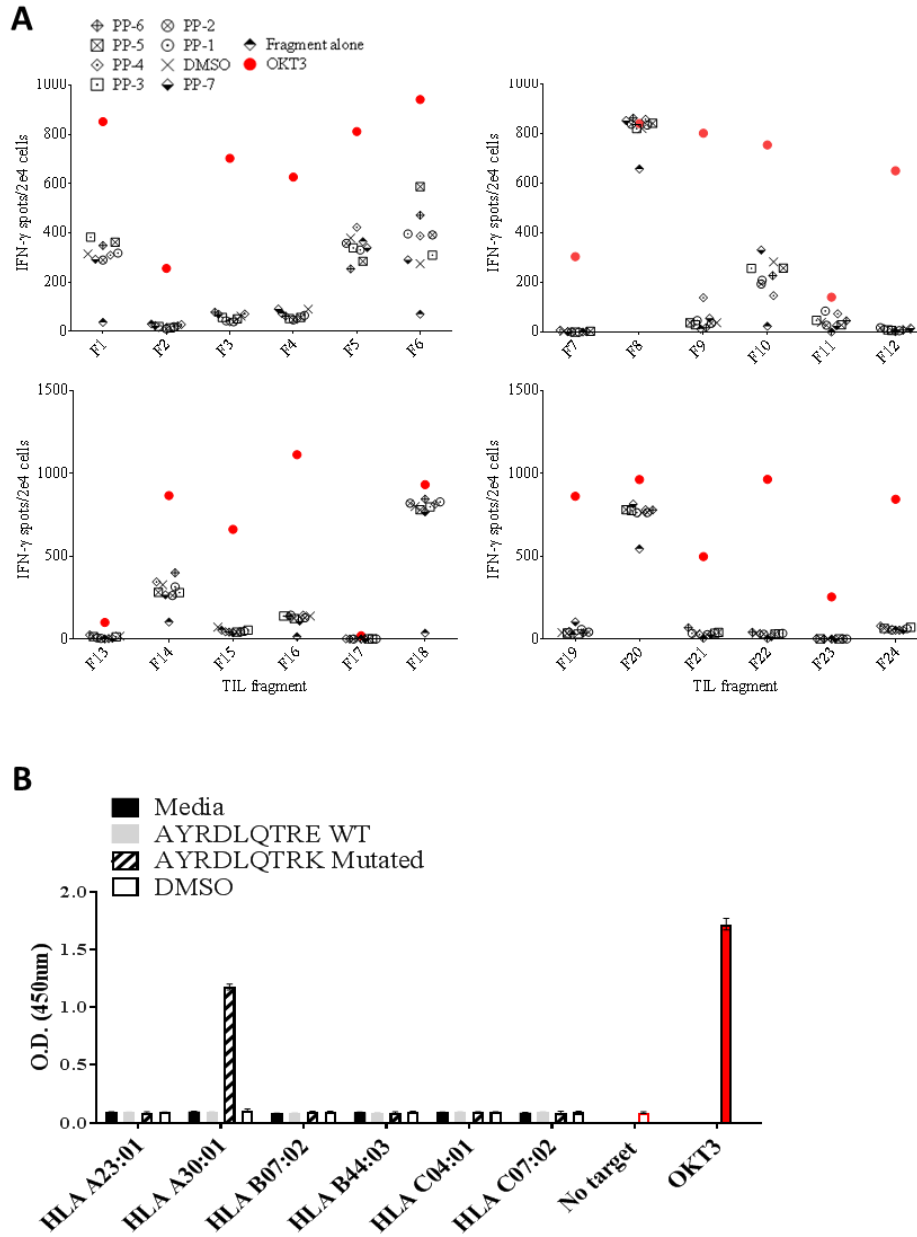

**Figure S1: Pt.4078 fragment TIL screen, GBAS HLA-restriction and minimal epitope. (A)** IFN $\gamma$  secretion of TIL fragments following co-incubation with autologous APCs pulsed with peptide pools. **(B)** IFN $\gamma$  ELISA of W18 following co-incubation with COS7 transfected with plasmids encoding the indicated HLA and pulsed with GBAS<sup>E207K</sup> or GBAS<sup>WT</sup> predicted minimal epitopes.

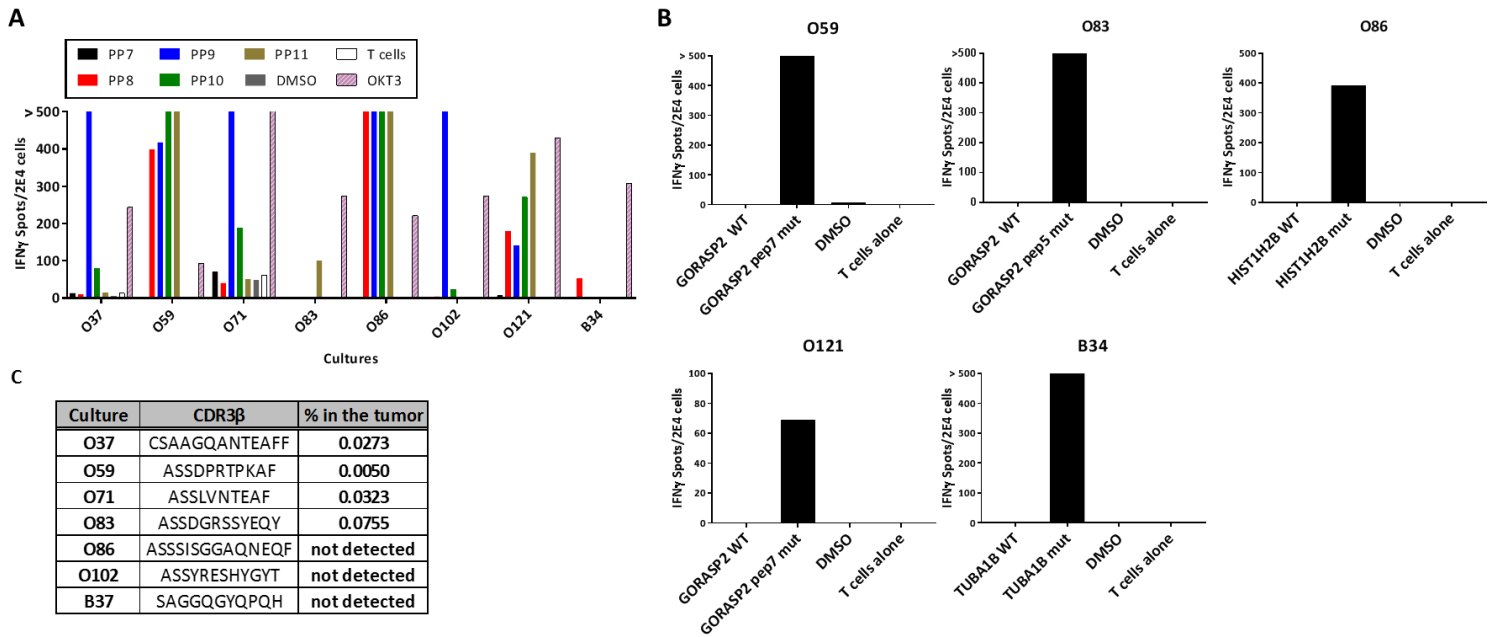

**Figure S2: Pt.4127 peptide pool screening, specificity test, and TCR frequencies in the tumor.** (A) Representative IFN $\gamma$ -ELISPOT assay of TIL microwell cultures co-incubated with autologous DCs pulsed with the individual peptide pools to identify the pool containing the putative neoantigen. (B) Neoantigen-reactive TIL cultures co-incubated with autologous DCs pulsed with mutated or WT counterpart HPLC-grade 25mer peptides. (C) CDR3 $\beta$  frequency of neoantigen-reactive TIL cultures in the tumor. Deep sequencing of TCR $\alpha$  and TCR $\beta$  chains was done on a sample of the tumor digest to determine the frequency of the neoantigen-reactive T cells.

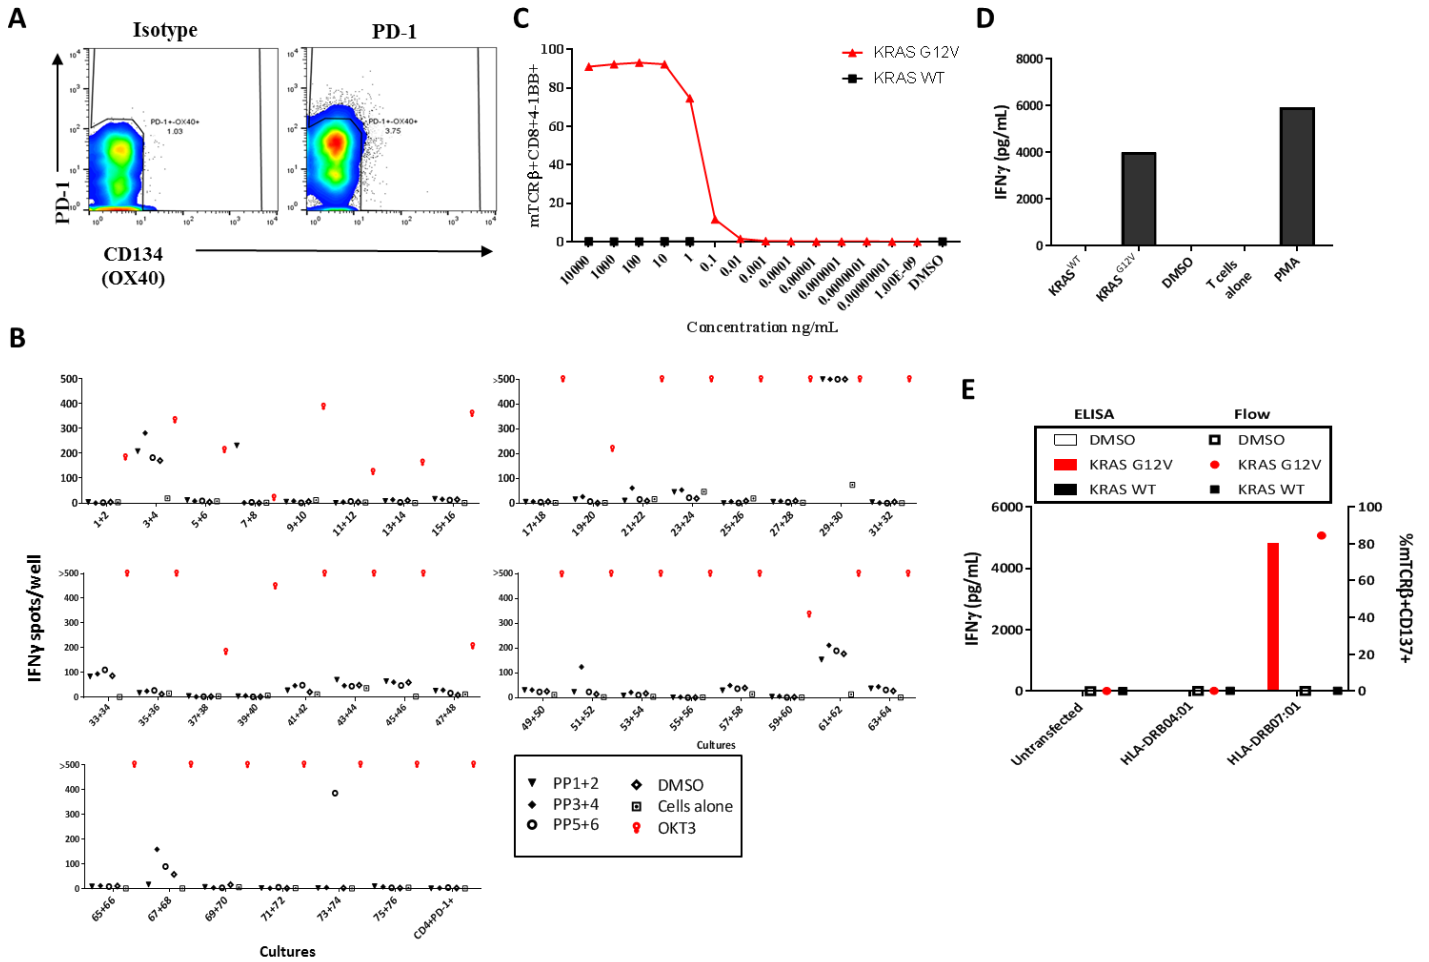

**Figure S3: Pt.4148 sorting strategy, first TIL microwell cultures screen, and characterization of the KRAS<sup>G12V</sup>-reactive TCR.** (A) Gating strategy used to enrich for reactive TILs. (B) IFN $\gamma$  secretion of pooled TIL cultures tested against autologous DCs pulsed with pools of 2 peptide pools. W73 + W74 showed enhanced reactivity against PP5+PP6 however further testing did not show specific reactivity against mutated peptides. (C) CD137<sup>+</sup>(4-1BB) upregulation on gated CD8<sup>+</sup>mTCR $\beta$ <sup>+</sup> following incubation with DCs pulsed with serial dilution of HPLC KRAS peptides. (D) IFN $\gamma$  secretion of sorted CD8<sup>+</sup>mTCR $\beta$ <sup>+</sup> tested against DCs pulsed with 10ug/mL KRAS<sup>WT</sup> or 10ng/mL KRAS<sup>G12V</sup> 24mer HPLC peptides. (E) HEK293-CIITA cells were transfected with plasmids encoding HLA-DRB1\*07:01 or control HLA-DRB1\*04:01 and pulsed with KRAS 24mer peptides. IFN $\gamma$  secretion and upregulation of surface T-activation markers were assessed. The symbols represent the peptide pools pulsed on the DCs and the controls.

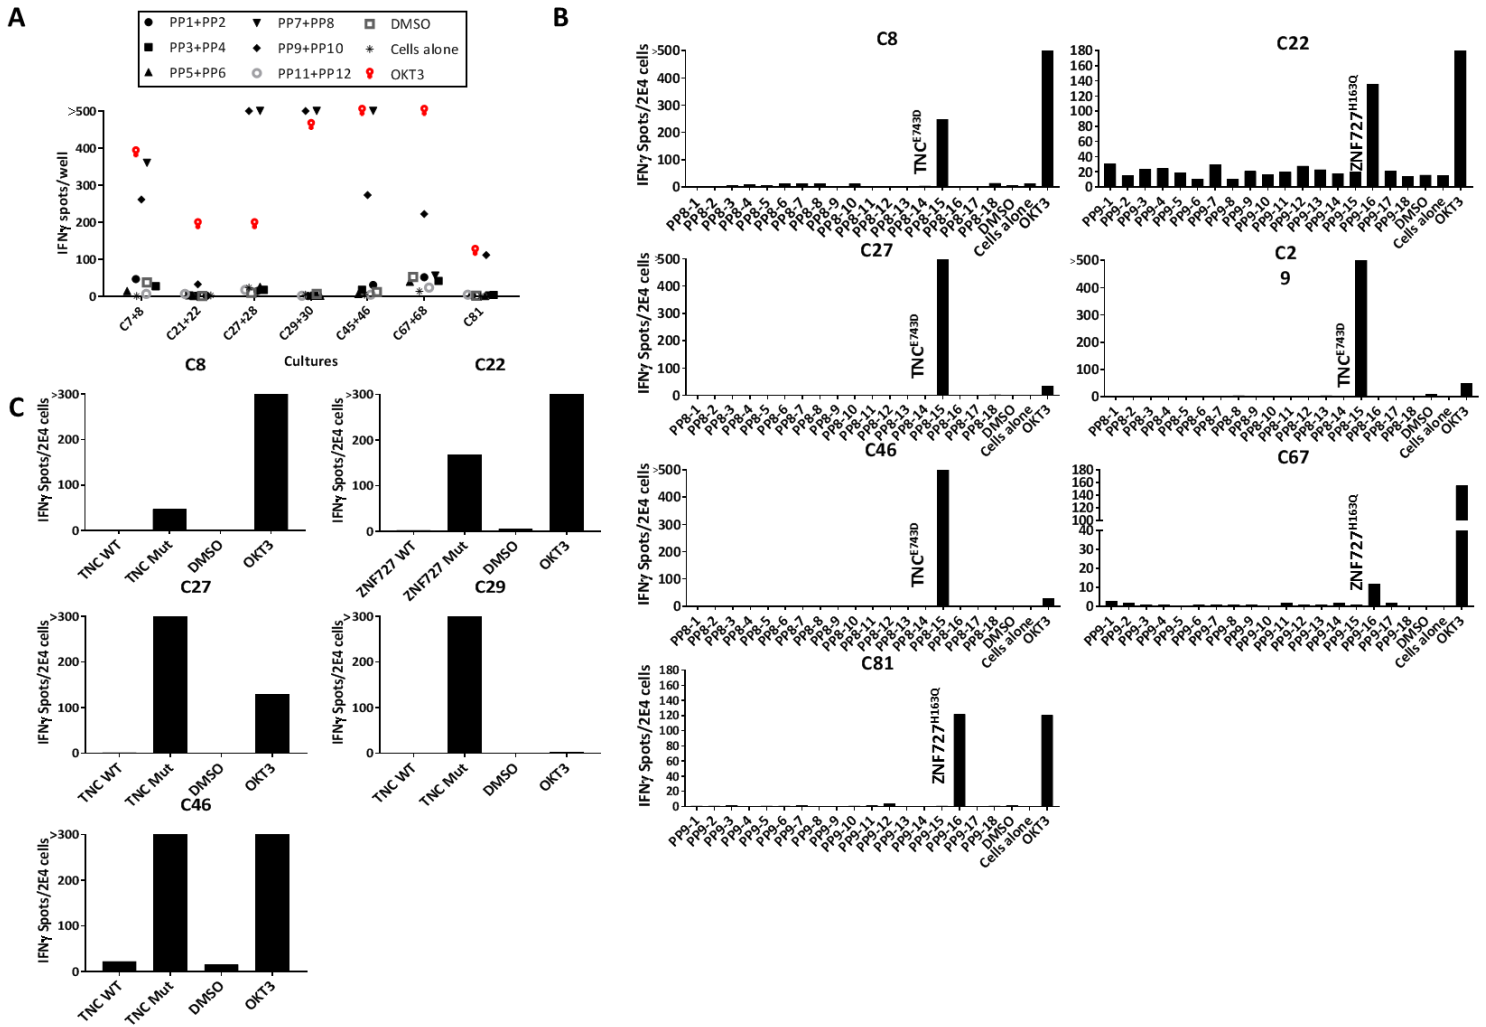

**Figure S4: Pt.4166 neoantigen-reactivity screenings.** (A) Representative IFN $\gamma$ -ELISPOT results of reactive TIL cultures co-cultured with autologous APCs pulsed with pooled peptide pools. Cells from 2 microwell cultures were combined for the assay. The symbols represent the peptide pools pulsed on the DCs and the controls. (B) To identify the putative neoantigen, autologous DCs pulsed with single peptides from the indicated peptide pools were co-incubated with TIL cultures that demonstrated reactivity in the previous assays. (C) To test neoantigen specificity, DCs were pulsed with HPLC-grade mutated or WT peptides and then cultured with the indicated TIL cultures. Based on TCR sequencing, cultures C22, C67, and C81 express the same TCR $\beta$ .

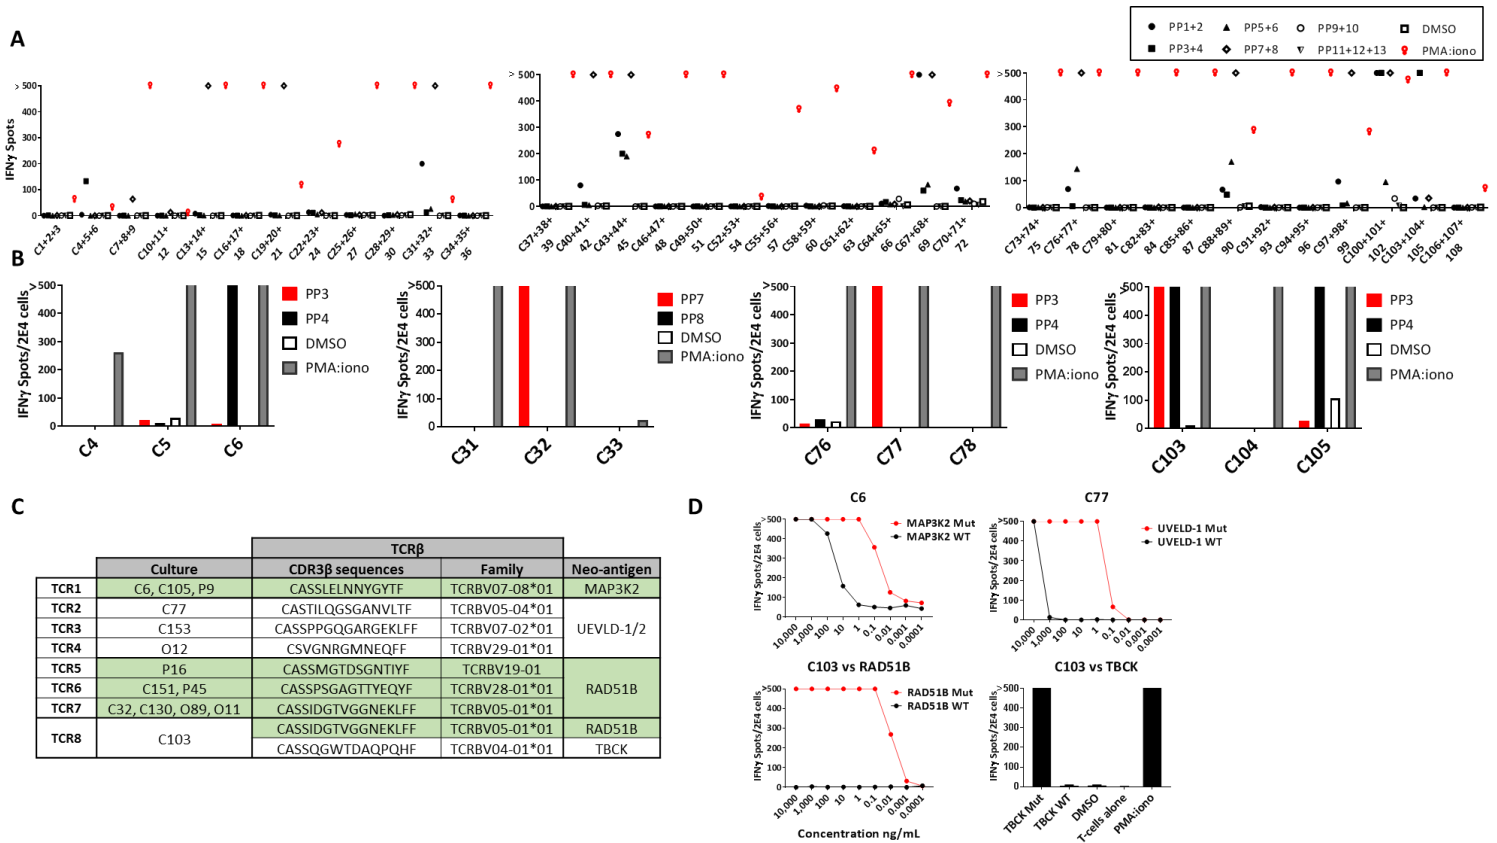

**Figure S5: Pt.4217 neoantigen-reactivity screening, TCR sequences, and peptide titration.**

(A) Representative IFN $\gamma$ -ELISPOT assay following co-incubation of pooled TIL microwell cultures with autologous DCs pulsed with 2 peptide pools. (B) Representative co-cultures of three TIL microwell cultures that demonstrated reactivity in the first screen against DCs pulsed with individual peptide pools. *e.g.* C4, C5, and C6 showed IFN $\gamma$  secretion against PP3+4 in the first screen (a) and they were tested individually against PP3 or PP4. C103 showed reactivity against both peptide pools, however against single peptides from each pool it demonstrated specific reactivity against a peptide from PP3 (C) TCR $\beta$  sequencing of all cultures that showed reactivity against target peptides. Several cultures express the same TCR chains. In C103 cultures, 2 TCRs were expressed targeting 2 putative neoantigens. (D) Representative co-cultures demonstrating the specificity of TIL microwell cultures against mutated peptides.

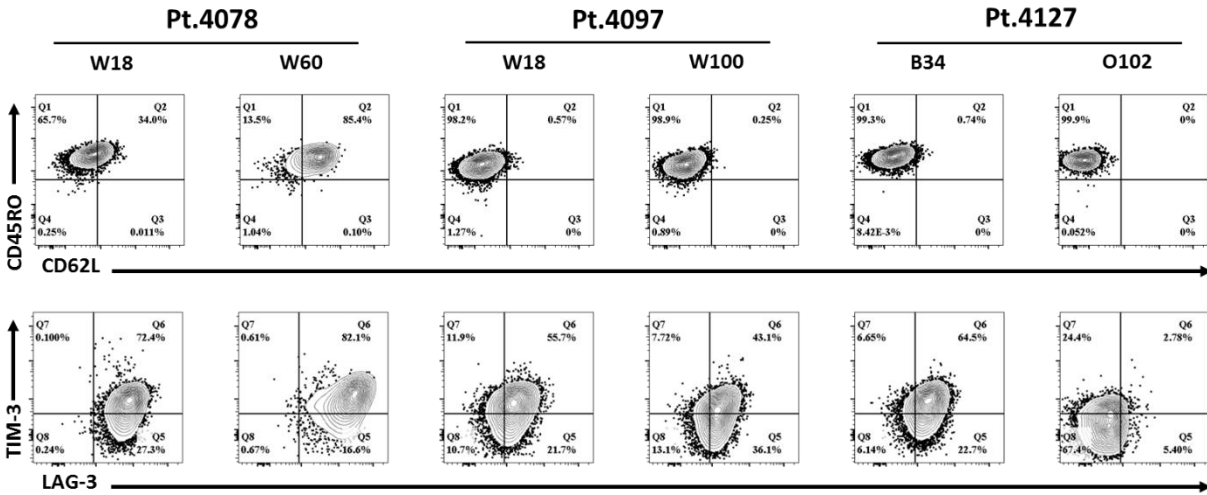

**Figure S6: Exhaustion phenotype of neoantigen-reactive cultures following in vitro expansion.** FACS-stain of neoantigen-reactive microwell cultures that underwent two or three rounds of REP. Five of the six cultures have a CD45RO<sup>+</sup>CD62L<sup>-</sup> effector memory phenotype. All six cultures express the inhibitory receptors TIM-3 and LAG-3, five of them have high levels of expression.

| Patient | Sex, Age† | Primary tumor              | Metastatic sites                                                              | Number of mutations assessed |
|---------|-----------|----------------------------|-------------------------------------------------------------------------------|------------------------------|
| Pt.4078 | M, 48     | GE junction adenocarcinoma | Liver; Retroclavicular, mediastinal, hilar, retrocural, and RP LNs; L adrenal | 104                          |
| Pt.4166 | F, 45     | Sigmoid colon cancer       | Liver, lung, RP LN, Cervical LN                                               | 157                          |
| Pt.4217 | M, 49     | Sigmoid colon cancer       | Mediastinum, Lung, Liver                                                      | 176                          |
| Pt.4148 | F, 68     | Endometrial cancer         | Lung                                                                          | 108                          |
| Pt.4097 | F, 59     | Serous carcinoma of ovary  | Gastrohepatic ligament, R iliac LN                                            | 317                          |
| Pt.4127 | F, 58     | Ovarian                    | bilateral axilla                                                              | 180                          |

**Table S1: Patient characteristics**

† At the time of admission

**Table S2: Sequences of alpha and beta chains of the isolated and tested TCRs.**

| Patient ID              | Neoantigen                           | CD4/CD8           | TRBV              | TRAV            |
|-------------------------|--------------------------------------|-------------------|-------------------|-----------------|
| 4078                    | GBAS <sup>E207K</sup>                | CD8               | CASSETGWGAF       | CAVRAARQNFVF    |
|                         | PLXNB <sub>3</sub> <sup>W609G</sup>  | CD4               | CASNLQRAVNTEAF    | CAVKGEGGGADGLTF |
|                         | DLAT <sup>G294L</sup>                | CD4               | CASTGANVLT        | CAAGLNTGFQKLVF  |
|                         | TMPRSS <sub>4</sub> <sup>H233Y</sup> | CD4               | CASSSSGAFQPQHF    | CAGSGGSEKLVF    |
|                         | PSMD <sub>2</sub> <sup>G644A</sup>   | CD4               | CASRGVGGGTEAFF    | CAVGPPSGNTPLVF  |
| 4148                    | KRAS <sup>G12V</sup>                 | CD4               | CSAREGAGGMGTQYF   | CAASTGGGNKLTf   |
| 4217                    | MAP3K <sub>2</sub> <sup>S153F</sup>  | CD4               | CASLELNNGYTF      | CAVRDGGATNKLI   |
|                         |                                      |                   | CASTILQGSGANVLTf  | CAMTRPSGNTPLVF  |
|                         | UEVLD-1/2 <sup>F191V</sup>           | CD4               | CASSPPGQGARGEKLFf | CAAFKGAQKLVF    |
|                         |                                      |                   | CSVGNRGMNEQFF     | CAAFKGDYKLSF    |
|                         | RAD51B <sup>L202R</sup>              | CD4               | CASSPSGAGTTYEQYF  | CAYRRQYGNKLVF   |
|                         |                                      |                   | CASSIDGTVGGNEKLFf | CALDIGGNQFYF    |
| TBCK <sup>R747S</sup>   | CD4                                  | CASSIDGTVGGNEKLFf | CALDIGGNQFYF      |                 |
| 4127                    | TP53 <sup>G245S</sup>                | CD4               | CASSYRESHYGYTF    | CAVKWTGGFKTIF   |
|                         |                                      |                   | CSAAGQANTEAFF     | CAVNDAGNMLTF    |
|                         |                                      |                   | CASSLVNTEAFF      | CAVKGDYKLSF     |
|                         | HIST1H2BM <sup>E77V</sup>            | CD4               | CASSISGGAQNEQFF   | CAVGLHTGGFKTIF  |
|                         | GORASP <sup>L248FS</sup>             | CD4               | CASSDPRTPKAFF     | CAVGGSNDYKLSF   |
|                         |                                      |                   | CASSDGRSSYEQYF    | CVGGLSGTYKYIF   |
| TUBA1B <sup>S287T</sup> | CD4                                  | CSAGGQGYQPQHF     | CIVSGNNAGNMLTF    |                 |



**Table S3: Pt.4078 mutated peptides and peptide pools**

| <b>4078 PP1</b>         | <b>Mutated peptide</b>     |    | <b>4078 PP5</b>            | <b>Mutated peptide</b>     |    |
|-------------------------|----------------------------|----|----------------------------|----------------------------|----|
| 4078_ACAP3              | LCSVKPCEDIERSFCFEVLSPTKSC  | 1  | 4078_Ex_KRT10              | GGSSGGGYGGSSSSGGHGGSSSSGG  | 1  |
| 4078_NBPF9              | YKVLVHSQERELMQLKEKLEGRDA   | 2  | 4078_Ex_ADAMTSL5           | QTPTLAPDPCPPSPDTRGRAHRLH   | 2  |
| 4078_NBPF15             | TKITFEEDKVDALIGSSSHVEWED   | 3  | 4078_Ex_ZBTB45             | FSHRALLERHLAVHPAP          | 3  |
| 4078_FAM171A1           | SMSHINLLFSRRSSEFPGLSVTSH   | 4  | 4078_Ex_THNSL2             | FMPEELPQLDRGPLCQWSTLSYPGL  | 4  |
| 4078_ZNF518A            | MQSPLLNSEQKKNIIVQTSKGLIP   | 5  | 4078_Ex_ENSG00000144115    | MELPQLDRGPLCQWSTLSYPGL     | 5  |
| 4078_DLAT               | PTPSAPCPATPAVPKGRVFSPLAK   | 6  | 4078_Ex_JPH2               | PASPASDGPALPLPAIPRGGFALS   | 6  |
| 4078_TMPRSS4            | KQHVCGGSIILDPYVWLTAACHFRKH | 7  | 4078_Ex_ENSG00000179253    | YDFHLLSPALPSSTSVAREGPSLI   | 7  |
| 4078_OSBPL5             | ESGSDQSETPGALVRRGTTYVEQVQ  | 8  | 4078_Ex_PCDHB15            | YEALQAFEFVRVGTDRGFALSSEA   | 8  |
| 4078_SHANK2             | EIDGSHLPNLQKDDLIDLVTRVGH   | 9  | 4078_Ex_MAK                | IFKICQVLGTPKNSDWPEGYQLASS  | 9  |
| 4078_FBRSL1             | HRHTQPQQPPQPRLLPTHVPASLGA  | 10 | 4078_Ex_RIMS1              | RDMAKPAACKTPGNAENQHPQSPR   | 10 |
| 4078_G2E3               | LAIPITNTYKEFHENMDFTIRNTR   | 11 | 4078_Ex_NEFM               | RSNEKEQLQLNNRFAGYIEKVHYL   | 11 |
| 4078_LRRC49             | TVCPINIGEDHLCLLNFQHNFITRI  | 12 | 4078_Ex_PREX2              | QWVYNSIESAQEYLQKSHSKPPGDE  | 12 |
| 4078_TBL3               | LWALQDFSLCKTIEGHASVLKQVAF  | 13 | 4078_Ex_ACTL7B             | RPTYFISSTVGKCCPEAADAGDTRK  | 13 |
| 4078_SH2B1              | RQQEPTTSHDPPPPPEPPSWTDPQ   | 14 | 4078_Ex_ADAMTS13           | VRRILYCARAHGKDDGEEILLDTQC  | 14 |
| 4078_ZNF768             | DSSYLLRHQRTHYQKPYKCPHCGK   | 15 | 4078_Ex_ZNF658             | CNECGRSFAHISDLKAHQRIHTGEK  | 15 |
| <b>4078 PP2</b>         | <b>Mutated peptide</b>     |    | 4078_Ex_IDNK               | KDGVALKCEESGNEAKQAEMQLLVV  | 16 |
| 4078_ENSG00000135722(1) | RVCRAWAAAATCSVWHDTKIRFHPV  | 1  | <b>4078 PP6</b>            | <b>Mutated peptide</b>     |    |
| 4078_ENSG00000135722(2) | RVCRAWAAAATCSVWHDTKISQPSP  | 2  | 4078_Ex_GABRA3             | DSPTETKTYNSVRKVDKISRIIFPV  | 1  |
| 4078_ENSG00000135722(3) | RVCRAWAAAATCSVWHDTKIRRPTR  | 3  | 4078_Ex_PLXNB3             | PGISSQHFTYQGGVGGSWPVCGLG   | 2  |
| 4078_PIEZO1             | GPTNCSSPHALVFNTGLDWPVYASP  | 4  | 4078_Ex_DCAF8L2            | NTTVKGVNFYGPMSFVVSQSDCGH   | 3  |
| 4078_TCF25              | PRQRQRYVPKCTCLTPKSTWPRYS   | 5  | 4078_Ex_NYX                | VLEHLLNDNLLSELPADAFRGLRR   | 4  |
| 4078_TP53               | RCSDSDGLAPPQNLIRVEGNLVEY   | 6  | 4078_Ex_ZNF157             | KIFSMKSLCQHLRHTHTGEKPYECS  | 5  |
| 4078_KMT2B              | PSQGLTASPADPPRTFAWLPAGPV   | 7  | 4078_Ex_KDM5C              | AERHGRARGRARERRRRRKYVDRGG  | 6  |
| 4078_ZNF180             | CGKFSQSQSYLVEHQRTHTGEKPYE  | 8  | 4078_Ex_ENSG00000268674-1  | RAGTGASREEGTFGQNVWDKSDGSS  | 7  |
| 4078_GULP1              | RIQDLETENMELKIKYKIWKTN     | 9  | 4078_Ex_ENSG00000268674-2  | GTFGQNVWDKSDGSSIQVPQKMRVR  | 8  |
| 4078_DNAH7              | DLQDVQRYLKARILNGKLDLAADK   | 10 | 4078_Ex_ENSG00000268674-3  | SDGSSIQVPQKMRVRKMRAQT      | 9  |
| 4078_CUL3               | RYGCIRDHLRQTVLDMARERKGEV   | 11 | 4078_Ex_AGAP6-1            | EVGEDLHMHHVRDGRCLKLWLSLTL  | 10 |
| 4078_THUMPD2            | SKDSHTDEPGIKKVLES          | 12 | 4078_Ex_AGAP6-2            | VRDGRCLKLWLSLTLPIQSQAQYSR  | 11 |
| 4078_GGCX               | ELNPSNTDSSHSPKPPSNPDPVHSE  | 13 | 4078_Ex_AGAP6-3            | SLTFLPIQSQAQYSRGTLKQKLWLSL | 12 |
| 4078_ABHD16B            | PELGALVLDATFEDLVPLALKVMPH  | 14 | 4078_Ex_AGAP6-4            | AQYSRGTLKQKLWLSLTLPIQRQAQ  | 13 |
| 4078_PSMD2              | VRLAQGLTHLGKATLTLCPYHSDRQ  | 15 | 4078_Ex_AGAP6-5            | KLWLSLTLPIQRQAQYSRGTLKQML  | 14 |
| <b>4078 PP3</b>         | <b>Mutated peptide</b>     |    | 4078_Ex_ENSG00000204149-1  | EVGEDLHMHHVRDGRCLKLWLSLTL  | 15 |
| 4078_AIMP1              | GDEKKAKEKIEKNGEKKKQQAIA    | 1  | 4078_Ex_ENSG00000204149-2  | VRDGRCLKLWLSLTLPIQRQAQYSR  | 16 |
| 4078_PCDHB12            | TVTDLGTPLRKTKHNITVLVSDVND  | 2  | 4078_Ex_ENSG00000204149-3  | SLTLLPIQRQAQYSRGTLKQML     | 17 |
| 4078_TRIO               | QFQHAIEKTHQSTLQVQQAEMALQ   | 3  | <b>4078 PP7</b>            | <b>Mutated peptide</b>     |    |
| 4078_RICTOR             | RGYVAKQLEKWHGEYNSKYVDLIEE  | 4  | 4078_Ex_FAIM2(1)           | GMKAGAFPPAPTVPVLPSPWAYVDP  | 1  |
| 4078_MSH5-SAPCD1        | EVARKELENLDCIPSCSVIYIPLI   | 5  | 4078_Ex_IQSEC1             | GHHTQYCHMQNPAPYHHHHHHHPQ   | 2  |
| 4078_FAXC               | FSFYRTEFTFEDAGAENSFSRTPDT  | 6  | 4078_Ex_ENSG00000148926(1) | MGSQVAFVPPPPPARSSPDA       | 3  |

|                            |                            |    |                  |                            |   |
|----------------------------|----------------------------|----|------------------|----------------------------|---|
| 4078_TSPAN12               | LTHAWNFFQREFTCCGVVYFTDWLE  | 7  | 4078_Ex_KRTAP9-7 | PTCCRTTCWKPTIVTTCSSSTPCCQP | 4 |
| 4078_ING3                  | KSKNNNKSSSQQTSSSSSSSSLSLSC | 8  | 4078_FBXL8       | RVCRAWAAAATCSVWHDTKISCECE  | 5 |
| 4078_URGCP                 | RNTTMVLDVLPDTRPVEKESQMEEE  | 9  | 4078_Ex_GPR182   | QPKSRRHCLLLCTYVAVFVMCWLPY  | 6 |
| 4078_GBAS                  | HHLWAYRDLQTRKDIRNAAWHKHGW  | 10 | 4078_NEK11       | LLSKLDHPAIVKLHASFVEQDNFCI  | 7 |
| 4078_BCL7B                 | PSPQQSESLSPAYTSDFRDSDSQPP  | 11 | 4078_ARIH2       | NHMQCSKCKHDFRWMCLGDWKTGHS  | 8 |
| 4078_ENSG00000147687       | TNGLIFLLPKKN               | 12 | 4078_VPS41       | WKDNVTLIIGWGNVVKVCSVKERHA  | 9 |
| 4078_HMBOX1                | RYHANSMGQRSYRFEASEEDLDVDD  | 13 |                  |                            |   |
| 4078_HSPA5                 | LEEIVQPIISKLDGSAGPPPTGEED  | 14 |                  |                            |   |
| 4078_ANGPTL2               | PSARPVPQPPPAGPPRVYQPPTYNR  | 15 |                  |                            |   |
| 4078_POLA1                 | LKKKKYAALVVEATSDGNYVTKQEL  | 16 |                  |                            |   |
| <b>4078 PP4</b>            | <b>Mutated peptide</b>     |    |                  |                            |   |
| 4078_Ex_IGFN1              | EAGYRKDLGAPEGIGSGSKAGFRDG  | 1  |                  |                            |   |
| 4078_Ex_ENSG00000116883    | PAHLLPTSSLPIFPGLICLLTCLL   | 2  |                  |                            |   |
| 4078_Ex_ELTD1              | VVGVIYNKGFLHTNFYIFGYLSPAV  | 3  |                  |                            |   |
| 4078_Ex_WDFY4              | CTQLTFFPALHERLHSEDFLELCRE  | 4  |                  |                            |   |
| 4078_Ex_ENSG00000148926(2) | KGASRSPEDSCLCSPSPRPQQSGCR  | 5  |                  |                            |   |
| 4078_Ex_ENSG00000184956    | MDTSRTQSVCRETGGAALS        | 6  |                  |                            |   |
| 4078_Ex_OTOG               | PQLSQESPRTPTPRPALTPAAPLTT  | 7  |                  |                            |   |
| 4078_Ex_RAG2               | LPLGSPAVNCTVFPGGISVSSAILT  | 8  |                  |                            |   |
| 4078_Ex_GALNT9             | VSGDGVVRSAAATESGDGVRASAAMA | 9  |                  |                            |   |
| 4078_Ex_VWF                | QGDDFLTPSGLAGPRVEDFGNAWKL  | 10 |                  |                            |   |
| 4078_Ex_GOLGA8CP           | GSPHDKPTAQPIMQDHQEHPLGNS   | 11 |                  |                            |   |
| 4078_Ex_PDILT              | SCKGVVESAALVIWLRQISQKAFI   | 12 |                  |                            |   |
| 4078_Ex_HS3ST4             | GVEPHFFDRNYEEGLEWYRNVMPKT  | 13 |                  |                            |   |
| 4078_Ex_NARR               | GTPRPRVIVGSPLARVADADPASAP  | 14 |                  |                            |   |
| 4078_Ex_ENSG00000076604    | CPEDQLPLDYAKLPHYYPQIYPDPE  | 15 |                  |                            |   |
| 4078_Ex_MLLT6              | CCVCSDERGWAETPLVYCDGHACSV  | 16 |                  |                            |   |

**Table S4: Pt.4127 mutated peptides and peptide pools**

| <b>4127PP-1</b>               | <b>Mutated peptides</b>      | <b>#</b> | <b>4127PP-4</b>                        | <b>Mutated peptides</b>    | <b>#</b> |
|-------------------------------|------------------------------|----------|----------------------------------------|----------------------------|----------|
| 4127 PDE4DIP p.P123R          | KLKGVTKNWEDVRGDQVKPDQYTEA    | 1        | 4127 SKIDA1 p.Q254P                    | AAAYYQVSAAGPPPKAAGAGGPGS   | 1        |
| 4127 PDE4DIP p.D84G           | AATPWMRDYFAEGDGEMVPRTSHTA    | 2        | 4127 OR10S1 p.G63S                     | TVAGNLLILLTVSSDSLPLMYHF    | 2        |
| 4127 LMNA p.S553R             | NLVTRSYPYLLGNSRPRQTSPQNCSSIM | 3        | 4127 OR4C45 p.L256fs                   | LFFVPFSYLYLRL              | 3        |
| 4127 NBPF1 p.T650P            | RCYSTPSGYLELPDSCQPYRSAFYI    | 4        | 4127 APBB1 p.V160G                     | GGAVMGREDVGGGGTRLSTGWYWET  | 4        |
| 4127 ACOT11 p.P165L           | REITKVKLQKILRTEEEKMEHSVA     | 5        | 4127 SHANK2 p.P26fs (1)                | VASSHTSAAQAPRTHEARAALPSAS  | 5        |
| 4127 ARHGAP21 p.S1950T        | NAQPHKLSETPGTKAEFHPCCL       | 6        | 4128 SHANK2 p.P26fs (2)                | HTSAAQAPRTHEARAALPSASPRVL  | 6        |
| 4127 SLCO2B1 p.S370F          | THQTSAHPGLELFPSCMEACSCPLD    | 7        | 4127 C11orf16 p.R442Q                  | ELVSKATHMKPPQTPPGEAHRKRS   | 7        |
| 4127 ERP27 p.T4I              | MKEICQLEIQVDNEQL             | 8        | 4127 TAS2R46 p.Y271Cp.P272Sp.T274A (1) | PVFMFCEAIAFSCSSAHPFILIWGN  | 8        |
| 4127 VWF p.A2178S             | DSCHQEQQVCEVISSYAHLCRTNGVC   | 9        | 4128 TAS2R46 p.Y271Cp.P272Sp.T274A (2) | MFCEAIAFSCSSAHPFILIWGNKKL  | 9        |
| 4127 RBP5 p.E70Q              | FRNYTVQFDVGVQFEEDLRSVDGRK    | 10       | 4127 TAS2R46 p.E265Q                   | ESLENKPVFMFCQIAFISYPSTHPF  | 10       |
| 4127 TM9SF1 p.G179R           | QISDAISRPMGFRDDVDEDELLEEL    | 11       | 4127 TAS2R46 p.S254N                   | FLSIIMSVWSFENLENKPVFMFCEA  | 11       |
| 4127 IGHV4OR15-8 p.V42A       | LVKPSSETLSLTCAVSGGSISSSNWW   | 12       | 4127 TAS2R30 p.A227V                   | GSQDPSTKVHIKVLQTVTSFLLCA   | 12       |
| 4127 NMB p.P73T               | LEPSSPSPLGTATHSLRDQRLQLS     | 13       | 4127 TAS2R30 p.Q210H                   | LICSLCKHLKMKHLHGKGSQDPSTK  | 13       |
| 4127 CPPED1 p.K241R           | KKLADKFIHAGVRVVFSGHYHRNAG    | 14       | 4127 DNAH10 p.L1631V                   | SAEGEVMEFRKIVRAEGRVEDWMTA  | 14       |
| 4127 TPSB2 p.G245D            | NGTWLQAGVSVSWDEGCAQPNRPGIY   | 15       | 4127 NACA p.I1395N                     | AMTPPSPKRGPANPSPKGDPTSPAV  | 15       |
| 4127 ABCC6 p.H644Q            | SGSAAGKDCITIQSATFAWSQESPP    | 16       | 4127 MYRFL p.R184G                     | DSGECRVWACHCGPMTSRSRSEVQ   | 16       |
| 4127 DNAAF1 p.L397S           | FTDIFKKEAKRDSEIRKQDTKSPRP    | 17       | 4127 PSPC1 p.M492V                     | GSRTGSETPQAPVSGVGPVSGGPGG  | 17       |
| <b>4127PP-2</b>               | <b>Mutated peptides</b>      | <b>#</b> | 4127 OR11H12 p.A140V                   | LLLTVMAFDQYLVICRPLLYPNIMT  | 18       |
| 4127 GRWD1 p.124_124del       | HGTKPPPSEGSDEEEEEDEEDEER     | 1        | <b>4127PP-5</b>                        | <b>Mutated peptides</b>    | <b>#</b> |
| 4127 LILRA6 p.L69W            | EYQLDKESPEPWRNPNLEPKNKA      | 2        | 4127 OR4N2 p.P58A                      | IFTIKSDPGLTAALYFFLGNLAFLD  | 1        |
| 4127 ZNF274 p.V42I            | DGSLADAPSEQIQQQKHPGDPEA      | 3        | 4127 SPTB p.S578F                      | KFRFFSMARDLLFWMESIIRQIETQ  | 2        |
| 4127 TBC1D8 p.R1079G          | PQDSQAFPEAAEGDWTVSLEHILAS    | 4        | 4127 ACOT4 p.R57C                      | LFRAHARYCADACGELDLERAPALG  | 3        |
| 4127 CAPN14 p.D520N           | FSKEIEDQNERQNEFFTKFFEKHPPE   | 5        | 4127 COQ6 p.D314V                      | SARQLPPSVARVVAKSRLVFLPLGLG | 4        |
| 4127 AAK1 p.541_542del        | QNFYQQQQQQQQQQQQQLATALHQQ    | 6        | 4127 GOLGA80 p.P450L                   | EAPRPMPSVPEDLESREAMSSFMDH  | 5        |
| 4127 NCOA3 p.1050_1050del     | VAMMMQQQQQQQQQQQQQQQQQQQQ    | 7        | 4127 PEAK1 p.S1542T                    | GGTAQGFPAEPTPTSSYPTRLIVS   | 6        |
| 4127 RUNX1 p.H241P            | EQLRRAMRVSPHPAPTNPASRL       | 8        | 4127 ACAN p.P864L                      | TELPSSGEESGALDVSQDFTGSGDV  | 7        |
| 4127 WDR4 p.K71N              | QGSGAILASTFSNSGSYFALTDDESK   | 9        | 4127 IFT140 p.V398I                    | WGSRKNLLAVNSIISVAILSERAMS  | 8        |
| 4127 PRMT2 p.P248H            | PLHVLLACCLPLHCTCASVPLHVLL    | 10       | 4127 LINC00273 p.P41T                  | PDIPYTHTEHPTMGSPNLRAHV     | 9        |
| 4127 TTC28 p.A2323P           | GHQSPAGSAPSPPLSYSSAGSARSS    | 11       | 4127 C16orf3 p.V60I                    | VGCIAPCVSCPIACPVGCPVGSMA   | 10       |
| 4127 FRG1 p.G163E             | ASNSCFIRCNEAEDIEAKSKTAGEE    | 12       | 4127 C16orf3 p.I52T                    | RACPVACPVGCPACPVSCPVACPV   | 11       |
| 4127 ZNF721 p.V297E           | RIHTGEKPYTCEECGKAFRQSANLY    | 13       | 4127 RPH3AL p.P44Q                     | GSLTRQQGGPHQQTMPGTPFTSGR   | 12       |
| 4127 HSD17B4 p.R131H          | DVVVNNAGILRDHSFARISDEDWDI    | 14       | 4127 MAP2K3 p.L186W                    | HVKMCDFGISGYWVDSVAKTMDAGC  | 13       |
| 4127 HLA-A p.A270Sp.E277Q (1) | RPAGDGTQKQWASVVVPSGQEQRYS    | 15       | 4127 KCNJ12 p.I249V                    | VTEEGEYIPLDQVDIDVGFDKGLDR  | 14       |
| 4128 HLA-A p.A270Sp.E277Q (2) | TFQKQWASVVVPSGQEQRYSYVQHEG   | 16       | 4127 KRT26 p.W118R                     | EANADLEQKIKGRYEKCEPGSSREH  | 15       |
| 4127 VARS2 p.V118L            | DPRDIISGVEMQLLQEKLRSGNLDP    | 17       | 4127 CDC27 p.Y574C                     | CFRNAINRVNPRHCNAWYGLGMIYYK | 16       |
| <b>4127PP-3</b>               | <b>Mutated peptides</b>      | <b>#</b> | 4127 C17orf99 p.W88R                   | LKSSPDLLTYFCRASSTSGAHVDSA  | 17       |
| 4127 TCRBV12S2 p.N89K         | GEVSDGYSVSRSKTEDLPLTLESAA    | 1        | <b>4127PP-6</b>                        | <b>Mutated peptides</b>    | <b>#</b> |
| 4127 RARRES2 p.R126S          | LVHCPDIETQVLRSCVPPGRLRVVT    | 2        | 4127 LINC00668 p.L63P                  | CIPTGPAGGGQLPGSLLKQTGSHSV  | 1        |

|                          |                            |          |                                   |                            |          |
|--------------------------|----------------------------|----------|-----------------------------------|----------------------------|----------|
| 4127 AOAHP p.D28N        | LLSLQSSASPANNQSRPSSLNGHT   | 3        | 4127 LINC00668 p.P49Q             | SEGTIHLHGHPQSCIPTGPAGGGQ   | 2        |
| 4127 ZMIZ2 p.L31F        | PFLPDLKPNLNSFHSSPSGSGPCDE  | 4        | 4127 ZNF491 p.G346V               | KAFRSAKYIRIHRVTRHTGEKPYECK | 3        |
| 4127 ASAP1 p.I721V       | ESDDDLDDKPPSPVKKERSPRPQSFC | 5        | 4127 ZNF20 p.G365V                | RHEKTHTEDKPYVCKQCGKGFRCAS  | 4        |
| 4127 FKBP15 p.P925T      | MVPSEQVVEEAVTLPPQALTTSQDG  | 6        | 4127 CYP4F12 p.P13L               | MSLLSLPWLGLRLVATSPWLLLLLV  | 5        |
| 4127 MGC21881 p.P63L     | QNLDPNPPIARFLLPLERISEVPRR  | 7        | 4127 RHPN2 p.Q233R                | GTDLDHQEKCLSRLYDHMPEGLTPL  | 6        |
| 4127 PPIAL4G p.A128V     | TAKTEWLDGKHVVFGKVKERVNIVE  | 8        | 4127 MAMSTR p.C151S               | PHPRMKPSLTPSPPGVPSPSPPPH   | 7        |
| 4127 PDE4DIP p.T2297A    | KVSKQERLLQSTAEHLKNANQQKES  | 9        | 4127 DHDH p.C132R                 | HGLWRAEAREDFRRGKAS         | 8        |
| 4127 SEC22B p.R107Q      | DEQHGGKVPTVSQPYSFIEFDTFIQ  | 10       | 4127 NAPSA p.I40T                 | RIPLHRVQGRRTLNLRLGWREPAE   | 9        |
| 4127 AX747988 p.R6P      | MRKPRPAGWETLSRKAPG         | 11       | 4127 ZNF841 p.V506F               | FSQHSHLAVHQRFTGEKPYKNEC    | 10       |
| 4127 MST1L p.376_377del  | GTVSKTRKGVQCWSAETPHKLQALT  | 12       | 4127 ZNF324B p.S26G               | ADASSKQPLLQGGQPHLFFPKLLS   | 11       |
| 4127 C1orf220 p.P3L      | MILVRGLWYCYLQVK            | 13       | 4127 FBN3 p.P1958H                | QNLEGSFRCICPHGFQVQSDHCIDI  | 12       |
| 4127 LAD1 p.184_185del   | QRGPWALEEEESLGREPEERKKGVPE | 14       | 4127 MUC16 p.G12402Ep.G12406R (1) | FTLNFTITNLQYEEDMRHPGSRKFN  | 13       |
| 4127 OR2T3 p.H239R       | LHLIHRMNSAAGRKRKALATCSSHMI | 15       | 4128 MUC16 p.G12402Ep.G12406R (2) | FTITNLQYEEDMRHPGSRKFNTER   | 14       |
| 4127 LDLRAP1 p.V174E     | AQAFKVAFEFQWESKEEKEKRDKAS  | 16       | 4127 GCKR p.L256P                 | QALAHSTVGQTLPIPLKLFPSIIS   | 15       |
| 4127 PTGER3 p.S375P      | RRLREQAPLLPTPTVIDPSRFCAQP  | 17       | 4127 FRG1B p.G17R                 | LSDSRIALKSGYRKYLGINSDELVG  | 16       |
| <b>4127PP-7</b>          | <b>Mutated peptides</b>    | <b>#</b> | 4127 CTCFL p.E50Q                 | EKDHRSPSELEAQRSTGAFQDSVLE  | 17       |
| 4127 KRTAP15-1 p.L43M    | PSNAIYSPNTCQMGSLLYNGCQETY  | 1        | 4127 RTEL1-TNFRSF6B p.R326C       | DIAKLKSCKCPPCLLAAGWGLLLAR  | 18       |
| 4127 PCP4 p.L28F         | TSGENVGCPILFFTHS           | 2        | <b>4127PP-10</b>                  | <b>Mutated peptides</b>    | <b>#</b> |
| 4127 FBXW12 p.P6L        | MEIRLLDLALKRIFSLD          | 3        | 4127 SBSN p.F361V                 | KFGQGQVHHAASQVGKETEKLGHGVH | 1        |
| 4127 ZNF717 p.V648I      | THQGTHTGEKPYICNECGKTFHRKS  | 4        | 4127_IFNL2_p.Y160H                | GPRTGRGLHHWLHRLQEAPKKESPG  | 2        |
| 4127 FRG1 p.R128C        | YLGINSDGLVVGCSAIGPREQWEP   | 5        | 4127_ZNF548_p.R312S               | QRVHTGERPYECSECGKFFMDSSTL  | 3        |
| 4127 FRG1 p.R135K        | GLVVGSRDAIGPKEQWEPVFQNGKM  | 6        | 4127_POTEF_p.I211T                | LNVLDNKKRTALTAKVQCQEDECAL  | 4        |
| 4127 FRG1 p.P140Q        | RSDAIGPREQWEQVFQNGKMALLAS  | 7        | 4127_SP9_p.S159R                  | AGRACRAPPGGRRGARYHGAGGGG   | 5        |
| 4127 SLC2A9 p.R265H      | VSQVEEVEVLAESHVQRSIRLVSVLE | 8        | 4127_SERTAD2_p.T94P               | LRPMFTPSSQPTPEPSDSYREAPPA  | 6        |
| 4127 C5orf60 p.Q210K     | REPLCPLKHPHSHKPPASTLSPNPTS | 9        | 4127_SEMG2_p.A396D                | GKSQNQVRIPSQDQYEGHKENKISY  | 7        |
| 4127 DHFR p.A96T         | WQPGRAWRGARTGRSSQASAGAS    | 10       | 4127_PCNT_p.A205P                 | EQRGIFTISDHPPEQRGMFTKECEQ  | 8        |
| 4127 AGPAT4-IT1 p.R173fs | TDLVSSHESLSPFLTPTCSVLRAL   | 11       | 4127_NEFH_p.A528P                 | AKSPVKEEAKSPPEAKSPEKEEAKS  | 9        |
| 4127 DST p.P2138L        | KENENSMVPQGALVGSLSVKNKAHC  | 12       | 4127_TRIOBP_p.D426E               | ASRTSSPNRATRENPRTSCAQRDNP  | 10       |
| 4127 PRSS1 p.P3Lp.L14V   | MNLLLILTFVAAAAPFDDDDKIVG   | 13       | 4127 ETFDH p.L217F                | CEPQTYGIGLKEFVWIDEKNWKPGR  | 11       |
| 4127 KMT2C p.P309S       | CCEEKCTQMYHYSCAAGAGTFQDFS  | 14       | 4127_FTMT_p.L49Q                  | PLDPRQIAPRRPQAAAASSRDPTGP  | 12       |
| 4127 COA1 p.58_58del     | LRPDLLLACSCSIRGNT          | 15       | 4127_DPCR1_p.L356Q                | ENREMTANENTTQFPAEPTHEGERT  | 13       |
| 4127 PNPLA7 p.W282S      | PARTVEWLNMRSSCSGHLHLCCPRR  | 16       | 4127_DPCR1_p.R386M                | TPSPAEPTEHGEMTANENTTSPPAE  | 14       |
| 4127 ANXA2P2 p.A271P     | LVQRIQNKPLYFPDQLYDSMKGKGT  | 17       | 4127_LFNG_p.R97P                  | RRDAGPPPGAAPPADGHRPLAEP    | 15       |
| 4127 SPATA31A3 p.H139Q   | GERAPDGASQSSQEPMEDAAPILSL  | 18       | 4127_GTF2IRD2P1_p.K269E           | AELKSICCIHPESLCAQKLMKMDHV  | 16       |
| 4127 RBMXL3 p.N609Y      | RSLDANSGGRSYAYSGGHDSSSWS   | 19       | 4127_AQP7_p.R234S                 | GYAINPSRDLPPSIFTFIAGWGKQV  | 17       |
| 4127 MAGEC1 p.P299A      | SPERTQSTFEFGAQSPLQIPVSSSS  | 20       | 4127_AQP7_p.M219I                 | GILVVIIGVSLGINTGYAINPSRDL  | 18       |
| <b>4127PP-8</b>          | <b>Mutated peptides</b>    | <b>#</b> | <b>4127PP-11</b>                  | <b>Mutated peptides</b>    | <b>#</b> |
| 4127_CKAP4_p.A167T       | LQGVQEQVQSLQTTFTGFESILRSS  | 1        | 4127_GORASP2_p.L284fs_1           | GLPPLPSMPPRNLTWHCTSPPAIRV  | 1        |
| 4127_SELPLG_p.T242P      | TPPAAMEAQTQPTAMEAQTAPAEA   | 2        | 4127_GORASP2_p.L284fs_2           | PSMPPRNLTWHCTSPPAIRVPPVIP  | 2        |
| 4127_LMNA_p.S622R        | NLVTRSYYLLGNSRPRTQSPQNCSIM | 3        | 4127_GORASP2_p.L284fs_3           | RNLTWHCTSPPAIRVPPVIPLGSRE  | 3        |
| 4127_CD68_p.N53K         | GTTSHGPTTATHKPTTTSHGNVTVH  | 4        | 4127_GORASP2_p.L284fs_4           | HCTSPPAIRVPPVIPLGSRELFCSSK | 4        |

|                           |                            |          |                             |                           |    |
|---------------------------|----------------------------|----------|-----------------------------|---------------------------|----|
| 4127_TUBA1B_p.S287T       | VISAEKAYHEQLTVAEITNACFEPA  | 5        | 4127_GORASP2_p.L284fs_5     | PAIRVPPVIPLGSRELFCSKLRRAA | 5  |
| 4127_HELQ_p.S987L         | NPEVLVRTIDHLLRRQAKQIVSSAK  | 6        | 4127_GORASP2_p.L284fs_6     | PPVIPLGSRELFCSKLRRAAVFPPA | 6  |
| 4127_NCOR2_p.Q1756P       | AMDRLAYLPTAPPPFSSRHSSSPLS  | 7        | 4127_GORASP2_p.L284fs_7     | LGSRELFCSKLRRAAVFPPAHQQR  | 7  |
| 4127_MAP3K8_p.N54S        | YEPSLMTMCQDSSQNDERSKSLLS   | 8        | 4127_GORASP2_p.L284fs_8     | LFCSKLRRAAVFPPAHQQRTRLPCH | 8  |
| 4127_TUBGCP6_p.S1174T     | GHVSDASISLGETVSDMAPARPRWN  | 9        | 4127_GORASP2_p.L284fs_9     | LRRAAVFPPAHQQRTRLPCHNYCKG | 9  |
| 4127_HIST1H2BM_p.E77V     | SFVNDIFERIAGVASRLAHYNKRST  | 10       | 4127_GORASP2_p.L284fs_10    | VFPPAHQQRTRLPCHNYCKGRRCLL | 10 |
| 4127_NBPF1_p.K184E        | EDVQVEVAEKVQESSAPREMPKAE   | 11       | 4127_GORASP2_p.L284fs_11    | HQQRTRLPCHNYCKGRRCLLTHCGC | 11 |
| 4127_MST1L_p.P38fs        | ALMTRSRLHQSQTTPRPGAV       | 12       | 4127_GORASP2_p.L284fs_12    | LRPCHNYCKGRRCLLTHCGCDAPHC | 12 |
| 4127_IGFN1_p.A1330D       | SMDEAGYRKDLGDPEGISSGSKADY  | 13       | 4127_GORASP2_p.L284fs_13    | NYCKGRRCLLTHCGCDAPHCQGP   | 13 |
| 4127_RHCE_p.C16W          | KYPRSVRRCLPLWALTLEAALILLF  | 14       | 4127_LILRB2_p.V354I         | HLGVVIGILVAVILLLLLLLLLFLI | 14 |
| 4127_MX11_p.Q34P          | APPAVPPVAWAAPPPALPEDPAGAK  | 15       | 4127_SKIDA1_p.G429delinsEEG | EGEEEEEEEEEEEEEGSGASDSSEV | 15 |
| 4127_SKIDA1_p.Q254P       | AAAYYQVSAAGPPPAAAAGAGGPGS  | 16       |                             |                           |    |
| 4127_AX747977_p.A58P      | LNLPSWDYRHMPTCPWLIFVFLVE   | 17       |                             |                           |    |
| <b>4127PP-9</b>           | <b>Mutated peptides</b>    | <b>#</b> |                             |                           |    |
| 4127_ENTPD1_p.T8R         | MKGTKDLRSQQKESNVKTF        | 1        |                             |                           |    |
| 4127_OR10G9_p.A90T        | KMLMTLVSPSGRTISFHSCVAQLYF  | 2        |                             |                           |    |
| 4127_KRTAP5-5_p.C221S     | GSSCCQSSCYKPSCCQSSCCVPVCC  | 3        |                             |                           |    |
| 4127_CDHR5_p.K538E        | PATPGGDTAQTPEPGTSQPMPPGVG  | 4        |                             |                           |    |
| 4127_SELPLG_p.T265M       | EATEAQTQTAMEAQTTPLAAMEA    | 5        |                             |                           |    |
| 4127_KRAS_p.G12D          | MTEYKLVVVGADGVGKSALTIQLI   | 6        |                             |                           |    |
| 4127_PABPC3_p.V365L       | MNGRIVATKPLYLALAQRKEERQAY  | 7        |                             |                           |    |
| 4127_POTEM_p.R66S         | MKTLRSKMGKWCSCFPWCRGSGKS   | 8        |                             |                           |    |
| 4127_HNRNPC_p.D268C       | GADDSAEEDLLCDDDNEDRGDDQL   | 9        |                             |                           |    |
| 4127_TUFM_p.M4V           | MTTVAAATLLRATPHF           | 10       |                             |                           |    |
| 4127_KRTAP1-5_p.S57C      | CGFPSFSTSGTCCSSCCQPSCCETS  | 11       |                             |                           |    |
| 4127_KRTAP1-3_p.F44C      | TSCCQPSCCQTSCCGFPSFSTSGTC  | 12       |                             |                           |    |
| 4127_TP53_p.G245S         | HNYMNCSSCMGSMNRRPILTIITL   | 13       |                             |                           |    |
| 4127_RPTOR_p.A941T        | MFDKGPEQTADDTDDAAGHKSFISA  | 14       |                             |                           |    |
| 4127_TXNDC2_p.S129T       | GDIPKAPEETIQTKKEDLPKSSEKA  | 15       |                             |                           |    |
| 4127_EMR2_p.L153F_p.K154I | GSYTCQCLPGFKFIPEDPKLCTDVNE | 16       |                             |                           |    |
| 4127_ZNF737_p.F322L       | EKPYKCEECGKALKHPSVLTHKRI   | 17       |                             |                           |    |
| 4127_ZNF676_p.E389V       | VSTLNTHKAIHAVEKPYKCEECGKA  | 18       |                             |                           |    |

**Table S5: Pt.4148 mutated peptides and peptide pools**

| 4148PP-1                      | Mutated Peptide              | #  | 4148PP-4                  | Mutated Peptide             | #  |
|-------------------------------|------------------------------|----|---------------------------|-----------------------------|----|
| 4148_HSD3B2_p.R20C            | TGAGLLGQRIVCLLVEEKELKEIR     | 1  | 4148_SIX5_p.L194V         | AVDKYRLRKKFPVPKTIWDGEETVY   | 1  |
| 4148_SPTA1_p.Q1981K           | KQDTLDASLQSFQKQERLPEITDLKD   | 2  | 4148_SHANK1_p.A1435P      | RAGLGSQEKLSPSPAARRSLLHR     | 2  |
| 4148_CACNA1E_p.A10T           | MARFGEAVVTRPGSGDGDSDQS       | 3  | 4148_ZNF841_p.R505I       | VFSQHSHLAVHQIMVTGEKPKYKCN   | 3  |
| 4148_IGFN1_p.S2058C           | SGSKAGFRDGLGCSVEMGSVNEAGY    | 4  | 4148_ZNF841_p.V493D       | GEKPYKCNCEGKDFSQHSHLAVHQR   | 4  |
| 4148_TRIM58_p.A76V            | FRPSGFRPNRQLVGLVESVRRRLGLG   | 5  | 4148_ZNF83_p.R224Q        | KVFHQISHLAHQHTIHTGEKPYECN   | 5  |
| 4148_LRR1Q3_p.F274L           | KGYEDKLLKDLFLKPKETNKGKLAY    | 6  | 4148_EPS8L1_p.V17G        | WPRRIWGSQDEGGFASSVRRPHLT    | 6  |
| 4148_ZWINT_p.V45I             | ELPAKILVEFVICTR              | 7  | 4148_ZNF497_p.S175L       | ACRECGKAFAHLQLIHHQETHSGL    | 7  |
| 4148_AK302451_p.W100C         | CQSSGTSSTSCSCQFSRTSSTCRQC    | 8  | 4148_SLC20A1_p.G408S      | HLAKVGDGCMGDSDDKPLRRNNSYTS  | 8  |
| 4148_PTEN_p.M270K             | FHKQNKMLKKDKKFHFVWNTFFIPG    | 9  | 4148_POTEE_p.H67L         | KTLRSKMGKWCHLCFPCCRGSGKSN   | 9  |
| 4148_RRP12_p.R68S             | VKLHNEQLQSGSLSLGKSEAPETPME   | 10 | 4148_MYT1L_p.V257F        | RKSELSDLDDSDVRETVDSLKLLA    | 10 |
| 4148_MMP10_p.V214I            | WTEIDASGTNLFIAAHELGHSLGLF    | 11 | 4148_PUM2_p.S512P         | QLFPPSRLRYNRPDIMPSPGRSRLLE  | 11 |
| 4148_MUC5B_p.L4424Q           | SSTPGTTWILTEQTTTATTTASTGS    | 12 | 4148_ITSN2_p.R1658C       | LLHEVPTGCEWVCFDQLFLFEQKTL   | 12 |
| 4148_OR5AS1_p.A247T           | SKTFSTCASHLITVLFYGALLFMY     | 13 | 4148_ACTR3BP2_p.E150K     | IINVGYKRFLLQPKIFFYPEFANPDF  | 13 |
| 4148_CUX2_p.H1253P            | SGGPGILPGHSPDPPTQSPDSET      | 14 | 4148_STK4_p.F487fs        | DAIEAKRRRQQNF               | 14 |
| 4148_ZNF605_p.R514W           | HTGEKPYECSECWKTFFSEKSLIHH    | 15 | 4148_EPPIN_p.W96G         | NPSSPCPHLLPSGTGFVP          | 15 |
| 4148_AEBP2_p.R204G            | GGGSSATSGGRGGSLEMSDGEPL      | 16 | 4148_SOX18_p.A16P         | SPPGYGAQDDPPRRRDCAWAPGHGA   | 16 |
| 4148_KRAS_p.G12V              | MTEYKLVVGVAVGVGKSAITLIQLI    | 17 | 4148_SUMO3_p.P124H        | LCKLCLLSRRSHSASQVAGTIGA     | 17 |
| 4148PP-2                      | Mutated Peptide              | #  | 4148PP-5                  | Mutated Peptide             | #  |
| 4148_OR6C6_p.R62H             | DPRLKTPMYFFLHNF5FLEVIFFTV    | 1  | 4148_TXNRD2_p.V26G        | RFRWRTQAVAGGGRGAARGAAAGQR   | 1  |
| 4148_HELB_p.C781Y             | QSRLVFGIGDKIYCTRNAVYLDLLP    | 2  | 4148_TRIOBP_p.R576T       | TSSPNRATRDNPPTTSCAQRDNPRAS  | 2  |
| 4148_OR10G2_p.T121S           | FHFLGSTQCFLYSLMAYDRYLAIQC    | 3  | 4148_PIK3CA_p.R88Q        | EAEREFFDETRQLCDLRLFQPFLLK   | 3  |
| 4148_TGM1_p.R656Q             | DRVTMPVAYKEYQPHLVLDQGAMLLN   | 4  | 4148_DGKG_p.T390P         | KGELVMQYKIIPPPGTHPLLVLVNP   | 4  |
| 4148_BC107108_p.V3I           | MYIRVEIENVPCEVF              | 5  | 4148_PTPN23_p.S1038R      | PLPAHSGALFPFRPGPPQPPHPLA    | 5  |
| 4148_LCMT2_p.K453M            | SPALGVLQLHFFMSEDNNTEDLKVT    | 6  | 4148_COL7A1_p.S120W       | RELSYKGNTRTWAAILHVADHVFL    | 6  |
| 4148_DUOX2_p.G1388E           | KFEVSVLVGGGIEVTPFASILKDLV    | 7  | 4148_UBA3_p.E32Q          | WEGRWNVHVKFKLQRSQGFTHPDFEP  | 7  |
| 4148_SEMA6D_p.G431R           | YRLTAISVDHSARPYQNYTVIFVGS    | 8  | 4148_IL17RC_p.A686G       | PGRGVGPGAGPGGGDGT           | 8  |
| 4148_GOLGA6A_p.Q198H_p.W200R  | EDRSSSCREAVLHRRLLQQTIKERALLN | 9  | 4148_PCDH18_p.D992V       | KSFSTFGKDSPNVEDTGDSTSSLL    | 9  |
| 4148_ZNF592_p.G472R           | SPSCSSGPRVPKRAAPGSQTGKKQQ    | 10 | 4148_ADAM29_p.P279S       | HLYCKWKSENITSRMQHDTSHLFTT   | 10 |
| 4148_NUDT16L1_p.R198G_p.W200G | EGSGAGRPGKEGGGGGPALGLPQGCVT  | 11 | 4148_FAT1_p.F18S          | MRNKEKKVIFESSQGISGSSFRSH    | 11 |
| 4148_RBL2_p.P967S             | ELNKDRTSRDSSSVMRSSSTLPVPQ    | 12 | 4148_ZNF732_p.R270I       | AFNRSSSTLTKHKIHAEEKPFCEE    | 12 |
| 4148_GNAO1_p.D218E            | RSEKRWIHCFFEEVTAIFCVALS      | 13 | 4148_KLHL5_p.E226K        | IQYAYTGRLELKKDNIECLLSTACL   | 13 |
| 4148_MSLNL_p.P107Q            | HLPMTVTYPTQSPTRAHSCHLPV      | 14 | 4148_UGT2B17_p.D341Y      | LAQIPYKVLWRFKYKPKNTLGSNTR   | 14 |
| 4148_CHTF18_p.G263R           | FRHPAQSQVGGGRSPALGGP         | 15 | 4148_FEM1C_p.547_547del   | AALNNHPDMMNLKSGAHFDATNLH    | 15 |
| 4148_TUBB4Q_p.K177R           | CIDNEALYDICSRTLKLPPIYGDL     | 16 | 4148_C9_p.E215K           | IYETKGEKNFRTKHYEEQIEAFKSI   | 16 |
| 4148_PROCA1_p.S297L           | GQGELSSDIVELSSPRKRENTVQA     | 17 | 4148_RAD17_p.D415V        | ILYCKRASLTELVSRLPSHLESEYE   | 17 |
| 4148PP-3                      | Mutated Peptide              | #  | 4148PP-6                  | Mutated Peptide             | #  |
| 4148_HDAC5_p.R189W            | VDWVGSELVGLGWGG              | 1  | 4148_MCTP1_p.G71R         | GTSDPYVKFKIGRKEVFRSKIIHKN   | 1  |
| 4148_CUEDC1_p.P152fs_1        | VFDRPYPLAPPTPASPYPYRAGLWSP   | 2  | 4148_PDE7B_p.R43S         | RLRGQTVRAERSGSSYPFIDFRLLN   | 2  |
| 4148_CUEDC1_p.P152fs_2        | YPLAPPTPASPYPYRAGLWSPYKPE    | 3  | 4148_SLC17A3_p.T150I      | GTKRVVIGISLFAISFLTLCIPLATD  | 3  |
| 4148_CUEDC1_p.P152fs_3        | PTPASYPYRAGLWSPYKPELSELE     | 4  | 4148_PIM1_p.D219delinsDH  | FVLILERPEPVQDHLDFITERGAL    | 4  |
| 4148_CUEDC1_p.P152fs_4        | PYRAGLWSPYKPELSELEPTTAG      | 5  | 4148_GBX1_p.A133T         | LAAAAAAAATATRNPEPGRRPE      | 5  |
| 4148_CUEDC1_p.P152fs_5        | AGLWSPYKPELSELEPTTAGQPSG     | 6  | 4148_WDR86_p.A412V        | PRGPCRRQPRHPVAPRAPRATRG     | 6  |
| 4148_PRC_D_p.W228G            | GCLGSWGAMVAGGGGCLPQAGWLW     | 7  | 4148_SPDYE1_p.G234R       | EDSKQNIHFYLRKNRSRIPLLRKR    | 7  |
| 4148_TMC6_p.A466V             | VFSEFMQSPYAVGQEAIVLLVPLV     | 8  | 4148_NPTX2_p.N408Y        | TNMPGNIIPWVDYVVDVFGGASKWP   | 8  |
| 4148_ACTG1_p.E3fs             | MEGDRRAGH                    | 9  | 4148_FOXH1_p.Q19P         | SRLGPPEAESPPPPKRRKRKRYLRH   | 9  |
| 4148_RBBP8_p.P217A            | KVSKSSTHPQHANNENILVADTYD     | 10 | 4148_KIF13B_p.H1609P      | TAPEAEPEAPISPPPPPTAVPAEEP   | 10 |
| 4148_ZNF700_p.S605R           | KPYECKQCGKAFRCASNLKXGHRTH    | 11 | 4148_WHSC1L1_p.V410F      | QPPEALSQAKKSFASTEKTRRRP     | 11 |
| 4148_ZNF709_p.F513L           | EKPYECKQCGKALSCSSSFRMHRT     | 12 | 4148_PLEKH2_p.T12A        | MVDRLANSEANARRISIVENCFGA    | 12 |
| 4148_ZNF14_p.T511A            | GEKPYECKLCKGAFSFGSSSLREHEK   | 13 | 4148_LAMC3_p.T191N        | LRPGEDERVAFCNSEFSDISPSGG    | 13 |
| 4148_ZNF100_p.T359N           | CEECGKAFNQSSNLTKHITHAGEK     | 14 | 4148_AQP7_p.L217H         | VIGILVVIQVSHGMNTGYAINPSR    | 14 |
| 4148_ZFN99_p.H740N            | CEECALRKHEIINTGKKPYKCEECG    | 15 | 4148_AQP7_p.Q192R_p.N194K | GMLQLCLFAITDREKNPALPGTEALVI | 15 |
| 4148_ZNF730_p.Q257K           | THKRIHTGEKPYKCEKCGKFFNQST    | 16 | 4148_RAB40AL_p.C261fs_1   | HKRSSLCKVKIWWPTPEPTQKLHQKQ  | 16 |
| 4148_ZNF724P_p.S295L          | KCKEKGKAFNQSLTLTRHKIHHAGE    | 17 | 4148_RAB40AL_p.C261fs_2   | LCKVKIWWPTPEPTQKLHQKQLQNFL  | 17 |
| 4148_ZNF675_p.I313K           | THKRIHTGEQPYKCEECGKAFTQSS    | 18 | 4148_LOC100129520_p.R689S | VPQGTAPLMFSRSHSLKVKVPMPKE   | 18 |
| 4148_SBSN_p.K223M             | HHGLSEGWKETEMFGQGIHHAAGQV    | 19 | 4148_GTPBP6_p.S93I        | QGVVSVVVPYDICGEHVPRRGGSH    | 19 |
| 4148_ZNF383_p.Q327H           | CGKAFTQSSKLVHHQRIHTGEKPYE    | 20 |                           |                             |    |
| 4148_ZNF227_p.V440E           | RVHTGEKPYKCEECGKGFSHNSPLI    | 21 |                           |                             |    |
